# Supplementary material
Source: PubMed Central journal article supplement (PMC3046293)
Supplement: NIHMS244553-supplement-1_si_001.pdf [file NIHMS244553-supplement-1_si_001.pdf]

## Supporting information

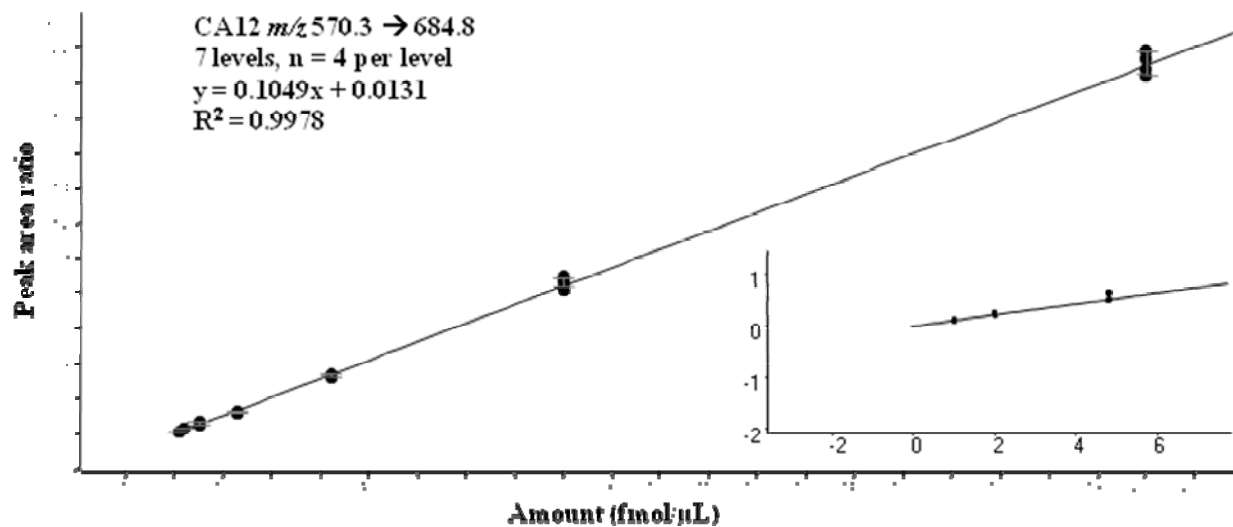

**Figure S-2.** Calibration curve for quantitation of enriched CA12 peptide 1  $m/z$  570.3 $\rightarrow$  684.8. The peak area ratios of light peptide:heavy peptide for different amounts of light peptide spiked into pRC3 blank matrix was measured using LC-SRM and plotted versus amount of light peptide. The inset is the enlarged region from 0.8 to 5.1 fmol/μL of the unlabeled peptide.

Data-base results for purified and trypsin digested CA12-FLAG protein standard. For this, Sequest algorithm incorporated into the Bioworks software, version 3.1, SR1.4 (Thermo Electron, San Jose, CA) was used. Search parameters included carbamidomethylation of cysteines,  $\pm 1.4$  Da and  $\pm 1.0$  Da tolerance for precursor and product ion masses, respectively. Only peptides resulting from tryptic cleavages with up to one missed cleavage were searched. The Sequest results were filtered by correlation score (Xcorr) values selected to obtain highly confident peptide and protein identifications: Xcorr 1.9, 2.2, and 3.75 for singly, doubly, and triply charged peptide ions, respectively.

Reference: sp|O43570|CAH12\_HUMAN Carbonic anhydrase 12 OS=Homo sapiens GN=CA12 PE=1 SV=1

Database: C:\xcalibur\database\CA12.fasta — Monoisotopic MW: 39427.1 — Number of Amino Acids: 354 — pl: 6.00

|     | 1-10       | 11-20      | 21-30      | 31-40       | 41-50      | 51-60      | 61-70      | 71-80      | 81-90      | 91-100     |
|-----|------------|------------|------------|-------------|------------|------------|------------|------------|------------|------------|
| 1   | MPRRSLHAAA | VLLLVILKEQ | FSSPAPVNGS | KWTFYFGPDGE | NSWSKYPSC  | GGLLQSPIDL | HSDILQYDAS | LTPLEFQGYN | LSANKQFLLT | NNGHSVKLNL |
| 101 | PSDMHIQGLQ | SRYSATQLHL | HWNFNDFPHG | SEHTVSGQHF  | AAELHIVHYN | SDLYPDASTA | SNKSEGLAVL | AVLIEMGSFN | PSYDKIFSHL | QHVYKQGEA  |
| 201 | FVPGFNIEEL | LPERTAEYR  | YRGLTTPPC  | NPTVLTWVFR  | NPVQISQQL  | LALETALYCT | HMDDPSPREM | INNFRQVQKF | DERLVVTSFS | QVQVCTAAGL |
| 301 | ELGIILSLAL | AGILGICIVV | VVSIWLFRRK | SIKKGDNKGV  | IYKPKATMET | EAHA       |            |            |            |            |

Protein Coverage Totals

- by Mass: 21324.0
- % by Mass: 54.08
- by Position: 188
- % by AA's: 53.11

Protein Coverage:  Include unmatched fragments in table

| Sequence                                                   | MH+     | % by Mass | Position  | % by AA's |
|------------------------------------------------------------|---------|-----------|-----------|-----------|
| <input checked="" type="checkbox"/> RSLHAAVLLLVILK         | 1617.06 | 4.10      | 4 - 18    | 4.24      |
| <input checked="" type="checkbox"/> SLHAAVLLLVILK          | 1460.96 | 3.71      | 5 - 18    | 3.95      |
| <input checked="" type="checkbox"/> EQPSSPAPVNGSK          | 1297.64 | 3.29      | 19 - 31   | 3.67      |
| <input checked="" type="checkbox"/> WTYFQPDGNSWSK          | 1673.72 | 4.25      | 32 - 45   | 3.95      |
| <input checked="" type="checkbox"/> WTYFQPDGNSWSKK         | 1801.82 | 4.57      | 32 - 46   | 4.24      |
| <input checked="" type="checkbox"/> QFLLTNGHSVK            | 1357.72 | 3.44      | 86 - 97   | 3.39      |
| <input checked="" type="checkbox"/> LNLPSDMHIQGLQSR        | 1708.88 | 4.33      | 98 - 112  | 4.24      |
| <input checked="" type="checkbox"/> SEGLAVLAVLIEMGSFNPSYDK | 2340.18 | 5.94      | 164 - 185 | 6.21      |
| <input checked="" type="checkbox"/> IFSHLQHVKYK            | 1399.78 | 3.55      | 186 - 196 | 3.11      |
| <input checked="" type="checkbox"/> YKQGEAFVPGFNIEELLPER   | 2336.19 | 5.93      | 195 - 214 | 5.65      |
| <input checked="" type="checkbox"/> TAEYR                  | 802.37  | 2.04      | 215 - 220 | 1.69      |
| <input checked="" type="checkbox"/> TAEYR                  | 1121.54 | 2.84      | 215 - 222 | 2.26      |
| <input checked="" type="checkbox"/> YRGLTTPPCNPTVLTWVFR    | 2308.19 | 5.85      | 221 - 240 | 5.65      |
| <input checked="" type="checkbox"/> EMINNFR                | 923.44  | 2.34      | 269 - 275 | 1.98      |
| <input checked="" type="checkbox"/> EMINNFRQVQK            | 1406.72 | 3.57      | 269 - 279 | 3.11      |
| <input checked="" type="checkbox"/> EMINNFRQVQKFDER        | 1953.96 | 4.96      | 269 - 283 | 4.24      |
| <input checked="" type="checkbox"/> QVQKFDER               | 1049.54 | 2.66      | 276 - 283 | 2.26      |
| <input checked="" type="checkbox"/> RKSIK                  | 631.42  | 1.60      | 329 - 333 | 1.41      |
| <input checked="" type="checkbox"/> KSIK                   | 603.42  | 1.53      | 330 - 334 | 1.41      |
| <input checked="" type="checkbox"/> SIKKGDNK               | 889.51  | 2.26      | 331 - 338 | 2.26      |
| <input checked="" type="checkbox"/> KGDNKGVIYK             | 1121.63 | 2.84      | 334 - 343 | 2.82      |
| <input checked="" type="checkbox"/> GDNKGVIYK              | 993.54  | 2.52      | 335 - 343 | 2.54      |
| <input checked="" type="checkbox"/> GVIYKPKATMETEAHA       | 1745.89 | 4.43      | 339 - 354 | 4.52      |
| <input checked="" type="checkbox"/> PATKMETEAHA            | 1185.56 | 3.01      | 344 - 354 | 3.11      |
| <input checked="" type="checkbox"/> METEAHA                | 788.32  | 2.00      | 348 - 354 | 1.98      |

Ready NUM

Enhanced signature peptide (ESP) results for CA12 (Note: ESP ranking is not included in this table)

| <b>This is a list of <i>at most</i> the top 5 peptides predicted to be the highest responding, from each protein, along with up to 5 transitions for multiple charge states</b> |            |                   |                 |          |                   |
|---------------------------------------------------------------------------------------------------------------------------------------------------------------------------------|------------|-------------------|-----------------|----------|-------------------|
| <b>The transitions are based on an LTQ with collision energy at 30</b>                                                                                                          |            |                   |                 |          |                   |
| <b>Acc.</b>                                                                                                                                                                     | <b>m/z</b> | <b>transition</b> | <b>sequence</b> | <b>z</b> | <b>y-ion type</b> |
| CA12_Isoform1                                                                                                                                                                   | 488.7949   | 416.25            | GVIYKPATK       | 2        | y4                |
| CA12_Isoform1                                                                                                                                                                   | 488.7949   | 707.41            | GVIYKPATK       | 2        | y6                |
| CA12_Isoform1                                                                                                                                                                   | 488.7949   | 410.75            | GVIYKPATK       | 2        | y7++              |
| CA12_Isoform1                                                                                                                                                                   | 488.7949   | 544.35            | GVIYKPATK       | 2        | y5                |
| CA12_Isoform1                                                                                                                                                                   | 488.7949   | 820.49            | GVIYKPATK       | 2        | y7                |
| CA12_Isoform1                                                                                                                                                                   | 326.199    | 410.75            | GVIYKPATK       | 3        | y7++              |
| CA12_Isoform1                                                                                                                                                                   | 326.199    | 354.21            | GVIYKPATK       | 3        | y6++              |
| CA12_Isoform1                                                                                                                                                                   | 326.199    | 416.25            | GVIYKPATK       | 3        | y4                |
| CA12_Isoform1                                                                                                                                                                   | 326.199    | 272.68            | GVIYKPATK       | 3        | y5++              |
| CA12_Isoform1                                                                                                                                                                   | 326.199    | 460.28            | GVIYKPATK       | 3        | y8++              |
| CA12_Isoform1                                                                                                                                                                   | 854.9436   | 684.84            | LNLPSDMHIQGLQSR | 2        | y12++             |
| CA12_Isoform1                                                                                                                                                                   | 854.9436   | 1368.67           | LNLPSDMHIQGLQSR | 2        | y12               |
| CA12_Isoform1                                                                                                                                                                   | 854.9436   | 801.46            | LNLPSDMHIQGLQSR | 2        | y7                |
| CA12_Isoform1                                                                                                                                                                   | 854.9436   | 535.28            | LNLPSDMHIQGLQSR | 2        | y9++              |
| CA12_Isoform1                                                                                                                                                                   | 854.9436   | 688.37            | LNLPSDMHIQGLQSR | 2        | y6                |
| CA12_Isoform1                                                                                                                                                                   | 570.2982   | 684.84            | LNLPSDMHIQGLQSR | 3        | y12++             |
| CA12_Isoform1                                                                                                                                                                   | 570.2982   | 741.38            | LNLPSDMHIQGLQSR | 3        | y13++             |
| CA12_Isoform1                                                                                                                                                                   | 570.2982   | 535.28            | LNLPSDMHIQGLQSR | 3        | y9++              |
| CA12_Isoform1                                                                                                                                                                   | 570.2982   | 798.4             | LNLPSDMHIQGLQSR | 3        | y14++             |
| CA12_Isoform1                                                                                                                                                                   | 570.2982   | 801.46            | LNLPSDMHIQGLQSR | 3        | y7                |
| CA12_Isoform1                                                                                                                                                                   | 427.9754   | 390.21            | LNLPSDMHIQGLQSR | 4        | y3                |
| CA12_Isoform1                                                                                                                                                                   | 427.9754   | 560.32            | LNLPSDMHIQGLQSR | 4        | y5                |
| CA12_Isoform1                                                                                                                                                                   | 427.9754   | 262.15            | LNLPSDMHIQGLQSR | 4        | y2                |
| CA12_Isoform1                                                                                                                                                                   | 427.9754   | 684.84            | LNLPSDMHIQGLQSR | 4        | y12++             |
| CA12_Isoform1                                                                                                                                                                   | 427.9754   | 280.66            | LNLPSDMHIQGLQSR | 4        | y5++              |
| CA12_Isoform1                                                                                                                                                                   | 679.3648   | 856.43            | QFLLTNGHSVK     | 2        | y8                |
| CA12_Isoform1                                                                                                                                                                   | 679.3648   | 969.51            | QFLLTNGHSVK     | 2        | y9                |
| CA12_Isoform1                                                                                                                                                                   | 679.3648   | 1082.6            | QFLLTNGHSVK     | 2        | y10               |
| CA12_Isoform1                                                                                                                                                                   | 679.3648   | 755.38            | QFLLTNGHSVK     | 2        | y7                |
| CA12_Isoform1                                                                                                                                                                   | 679.3648   | 541.8             | QFLLTNGHSVK     | 2        | y10++             |
| CA12_Isoform1                                                                                                                                                                   | 453.2456   | 485.26            | QFLLTNGHSVK     | 3        | y9++              |
| CA12_Isoform1                                                                                                                                                                   | 453.2456   | 541.8             | QFLLTNGHSVK     | 3        | y10++             |
| CA12_Isoform1                                                                                                                                                                   | 453.2456   | 428.72            | QFLLTNGHSVK     | 3        | y8++              |
| CA12_Isoform1                                                                                                                                                                   | 453.2456   | 378.19            | QFLLTNGHSVK     | 3        | y7++              |
| CA12_Isoform1                                                                                                                                                                   | 453.2456   | 615.33            | QFLLTNGHSVK     | 3        | y11++             |
| CA12_Isoform1                                                                                                                                                                   | 340.186    | 428.72            | QFLLTNGHSVK     | 4        | y8++              |
| CA12_Isoform1                                                                                                                                                                   | 340.186    | 378.19            | QFLLTNGHSVK     | 4        | y7++              |
| CA12_Isoform1                                                                                                                                                                   | 340.186    | 485.26            | QFLLTNGHSVK     | 4        | y9++              |
| CA12_Isoform1                                                                                                                                                                   | 340.186    | 321.17            | QFLLTNGHSVK     | 4        | y6++              |
| CA12_Isoform1                                                                                                                                                                   | 340.186    | 264.15            | QFLLTNGHSVK     | 4        | y5++              |

|               |          |         |                 |   |       |
|---------------|----------|---------|-----------------|---|-------|
| CA12_Isoform1 | 730.9818 | 630.92  | SLHAAAVLLLLVILK | 2 | y12++ |
| CA12_Isoform1 | 730.9818 | 811.6   | SLHAAAVLLLLVILK | 2 | y7    |
| CA12_Isoform1 | 730.9818 | 698.52  | SLHAAAVLLLLVILK | 2 | y6    |
| CA12_Isoform1 | 730.9818 | 585.43  | SLHAAAVLLLLVILK | 2 | y5    |
| CA12_Isoform1 | 730.9818 | 910.67  | SLHAAAVLLLLVILK | 2 | y8    |
| CA12_Isoform1 | 487.657  | 585.43  | SLHAAAVLLLLVILK | 3 | y5    |
| CA12_Isoform1 | 487.657  | 698.52  | SLHAAAVLLLLVILK | 3 | y6    |
| CA12_Isoform1 | 487.657  | 472.35  | SLHAAAVLLLLVILK | 3 | y4    |
| CA12_Isoform1 | 487.657  | 373.28  | SLHAAAVLLLLVILK | 3 | y3    |
| CA12_Isoform1 | 487.657  | 811.6   | SLHAAAVLLLLVILK | 3 | y7    |
| CA12_Isoform1 | 837.3652 | 1076.46 | WTYFGPDGENSWSK  | 2 | y10   |
| CA12_Isoform1 | 837.3652 | 1019.44 | WTYFGPDGENSWSK  | 2 | y9    |
| CA12_Isoform1 | 837.3652 | 1223.53 | WTYFGPDGENSWSK  | 2 | y11   |
| CA12_Isoform1 | 837.3652 | 807.36  | WTYFGPDGENSWSK  | 2 | y7    |
| CA12_Isoform1 | 837.3652 | 1386.6  | WTYFGPDGENSWSK  | 2 | y12   |
| CA12_Isoform1 | 558.5792 | 510.22  | WTYFGPDGENSWSK  | 3 | y9++  |
| CA12_Isoform1 | 558.5792 | 538.73  | WTYFGPDGENSWSK  | 3 | y10++ |
| CA12_Isoform1 | 558.5792 | 621.3   | WTYFGPDGENSWSK  | 3 | y5    |
| CA12_Isoform1 | 558.5792 | 404.18  | WTYFGPDGENSWSK  | 3 | y7++  |
| CA12_Isoform1 | 558.5792 | 612.27  | WTYFGPDGENSWSK  | 3 | y11++ |
